# Supplementary material for: One-step preparation of carbon dot-grafted trisodium citrate dihydrate for tunable photoluminescence and white light-emitting diodes
Source: Royal Society of Chemistry journal article supplement (doi:10.1039/c6ra21588b), 2016-01-01
Supplement: c6ra21588b1.pdf [file c6ra21588b1.pdf]

# One-Step Preparation of Carbon Dot-Grafted Trisodium Citrate Dihydrate for Tunable Photoluminescence and White Light-Emitting Diodes

Jiangling He,<sup>‡</sup> Youling He,<sup>‡</sup> Yonghao Chen, Bingfu Lei,<sup>\*</sup> Haoran Zhang, Jianle Zhuang, Mingtao Zheng, Yingliang Liu<sup>\*</sup>

Guangdong Provincial Engineering Technology Research Center for Optical Agriculture, College of Materials and Energy, South China Agricultural University, Guangzhou 510642, China

Email: [tlei@sf@scau.edu.cn](mailto:tlei@sf@scau.edu.cn); [liuy@sf@scau.edu.cn](mailto:liuy@sf@scau.edu.cn)

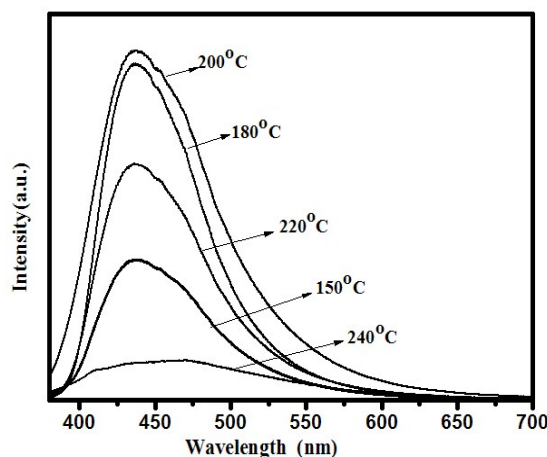

**Figure S1.** Emission spectra of the corresponding reaction system at different reaction temperature.

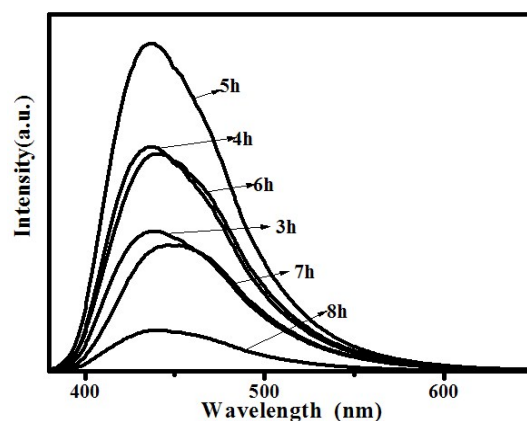

**Figure S2.** Emission spectra of the corresponding reaction system at different reaction time.

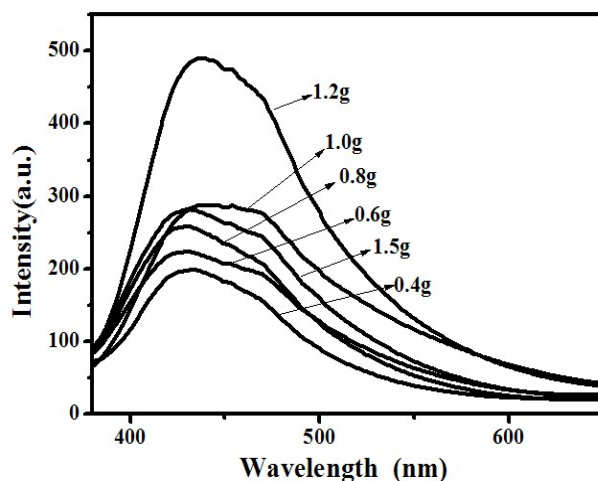

**Figure S3.** Emission spectra of the corresponding reaction system with various amounts of reactant.

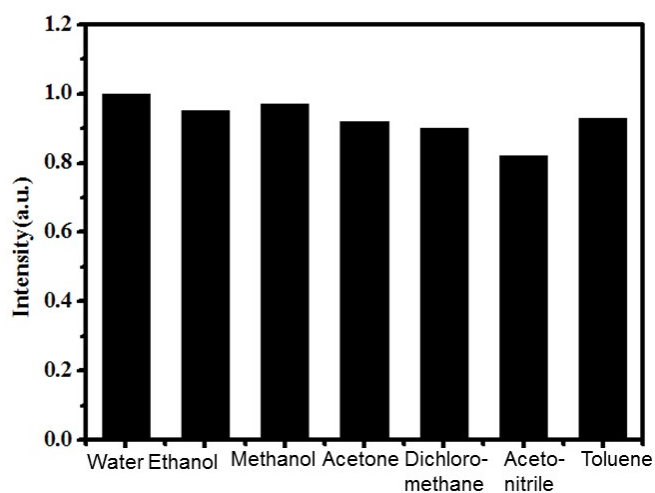

**Figure S4.** Effect of solvent on the fluorescence intensity of as-prepared CDs/SC.

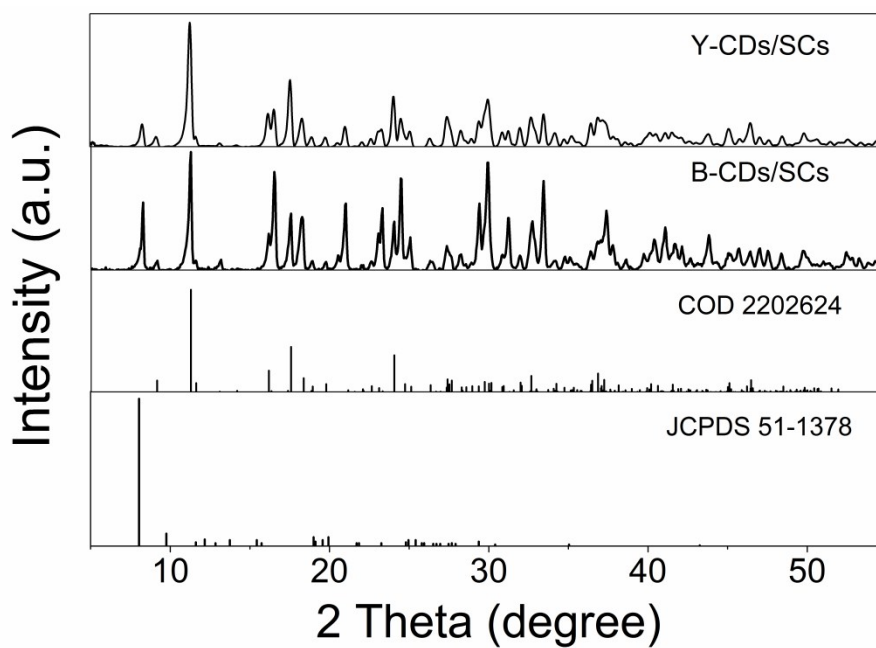

**Figure S5.** The XRD patterns of B-CDs/SC and Y-CDs/SC, and the standard card given for comparison.

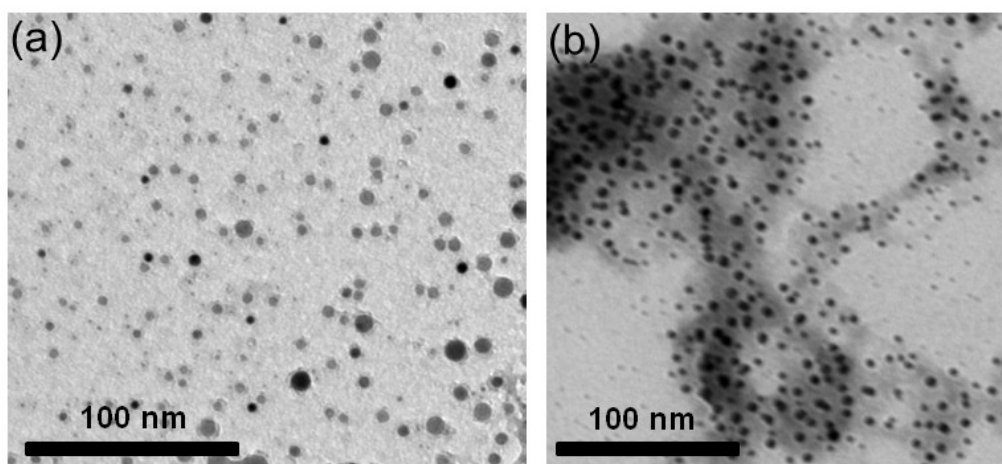

**Figure S6.** (a) and (b) TEM images of CDs extracted from B-CDs/SC and Y-CDs/SC, respectively.

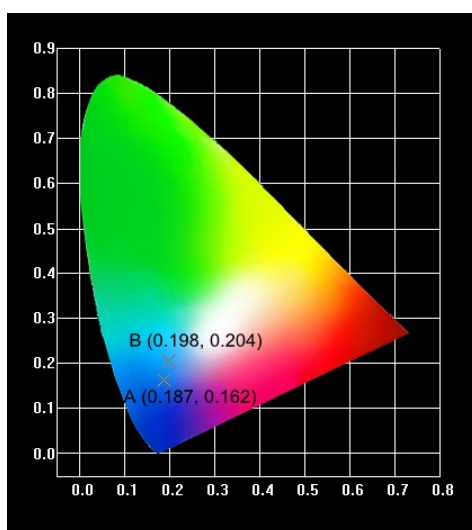

**Figure S7.** A and B represent CIE coordinates of dialyzed solutions of B-CDs/SC, and Y-CDs/SC under UV light (360 nm), respectively.

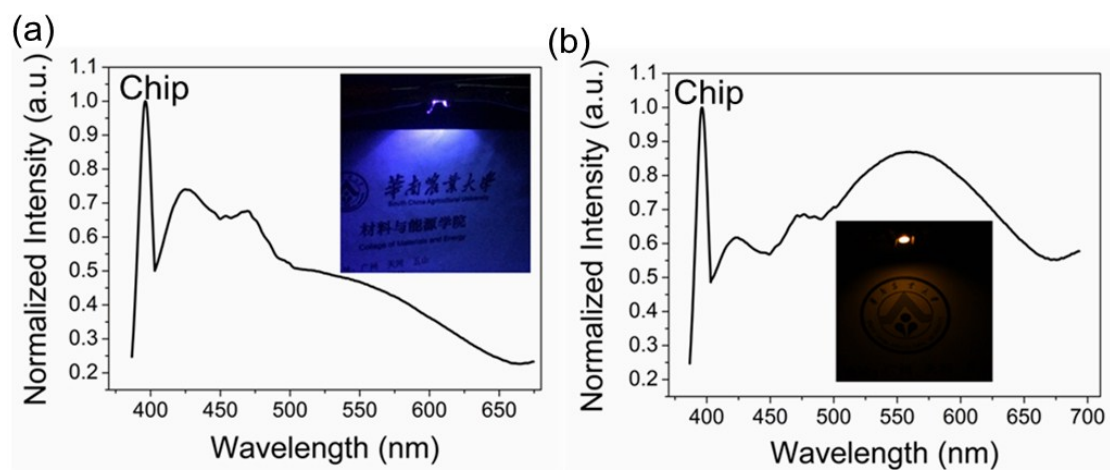

**Figure S8.** (a) Electroluminescence spectrum of the (B-CDs/SC and Y-CDs/SC)-based (mass ratio: 4.187) LEDs. Inset: Optical image of the corresponding LEDs at the current of 50 mA and voltage of 3.0 V. (b) Electroluminescence spectrum of the (B-CDs/SC and Y-CDs/SC)-based (mass ratio: 1.000) LEDs. Inset: Optical image of the corresponding LEDs at the current of 20 mA and voltage of 1.5 V.
